# Supplementary material for: Interfacial Crystallization and Supramolecular Self-Assembly of Spider Silk Inspired Protein at the Water-Air Interface
Source: MDPI journal article supplement (doi:10.3390/ma14154239), 2021-07-29
Supplement: s1 [file s1]

# Interfacial Crystallization and Supramolecular Self-Assembly of Spider Silk Inspired Protein at the Water-Air Interface

Pezhman Mohammadi <sup>1,\*</sup>, Fabian Zemke <sup>2,†</sup>, Wolfgang Wagermaier <sup>2</sup> and Markus B. Linder <sup>3</sup>

<sup>1</sup> VTT Technical Research Centre of Finland Ltd., FI-02044 Espoo, Finland

<sup>2</sup> Department of Biomaterials, Max Planck Institute of Colloids and Interfaces, D-14476 Potsdam, Germany; f.zemke@tu-berlin.de (F.Z.); wolfgang.wagermaier@mpikg.mpg.de (W.W.)

<sup>3</sup> Department of Bioproducts and Biosystems, School of Chemical Engineering, Aalto University, FI-02150 Espoo, Finland; markus.linder@aalto.fi

\* Correspondence: Pezhman.mohammadi@vtt.fi

† Current address: Fachgebiet Keramische Werkstoffe Chair of Advanced Ceramic Materials, Institute of Materials Science and Technology, Technische Universität Berlin, 10623 Berlin, Germany.

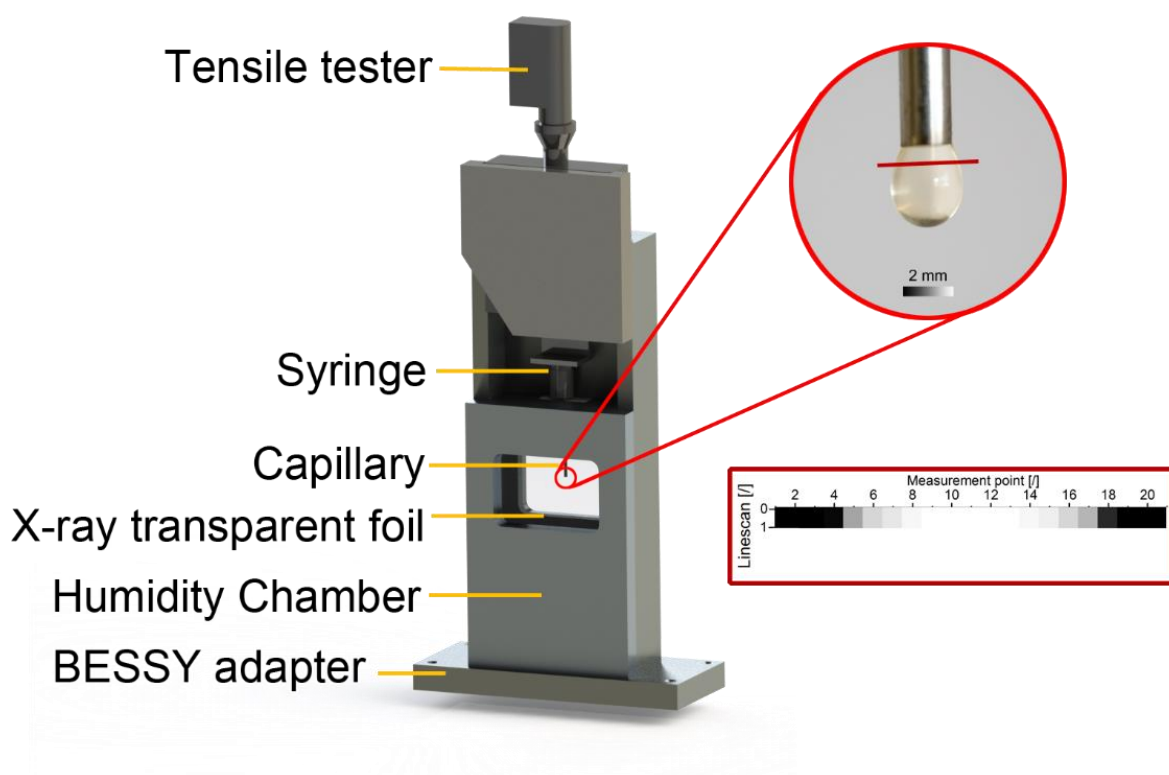

**Figure S1.** Overview of the used humidity measurement chamber with a motorized tensile testing machine, syringe/cannula, and x-ray transparent polymeric windows. The red circle marks the area of interest, where the droplet was formed.

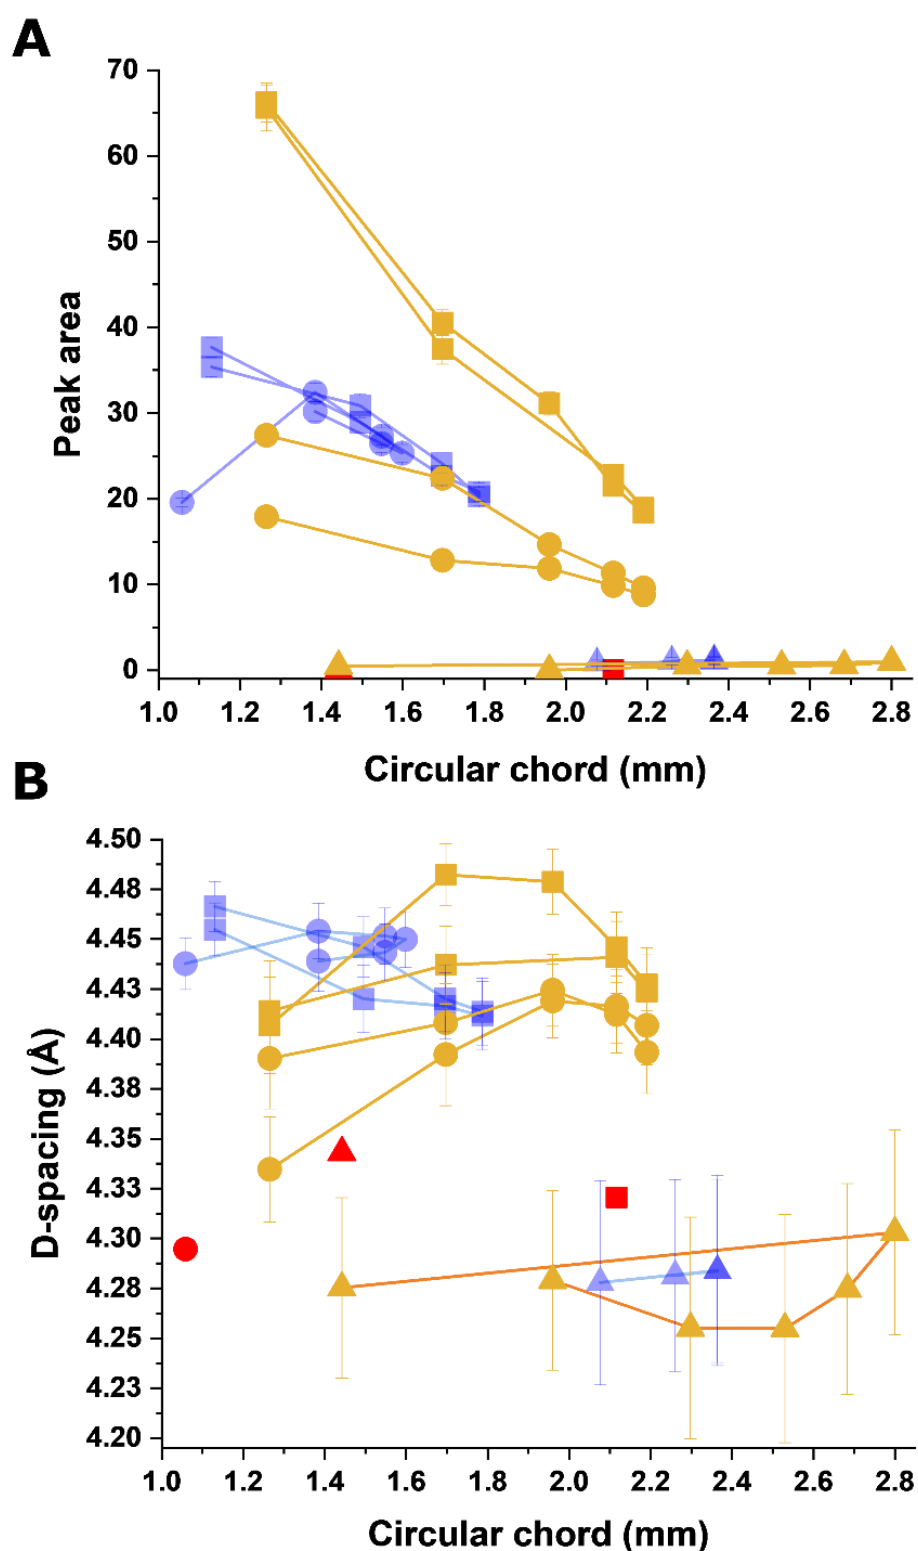

**Figure S2.** Effect of concentration and humidity on the formation of  $\beta$ -sheets analyzed by *in-situ* x-ray scattering. **(A)** Peak area fit over the circular chord for 0.2% w/v, 2% w/v and 15% w/v protein samples at 20% RH, 40% RH and 80% RH. **(B)** Peak fit position over the circular chord of the droplet corresponding to A. For better clarity, data points for 80% RH for all three concentrations were removed due to the unreliability of detections.
